# Supplementary material for: Large increases in carbon burial in northern lakes during the Anthropocene
Source: PubMed Central journal article supplement (PMC4674672; doi:10.1038/ncomms10016), 2015-11-26
Supplement: ncomms10016-s1.pdf [file ncomms10016-s1.pdf]

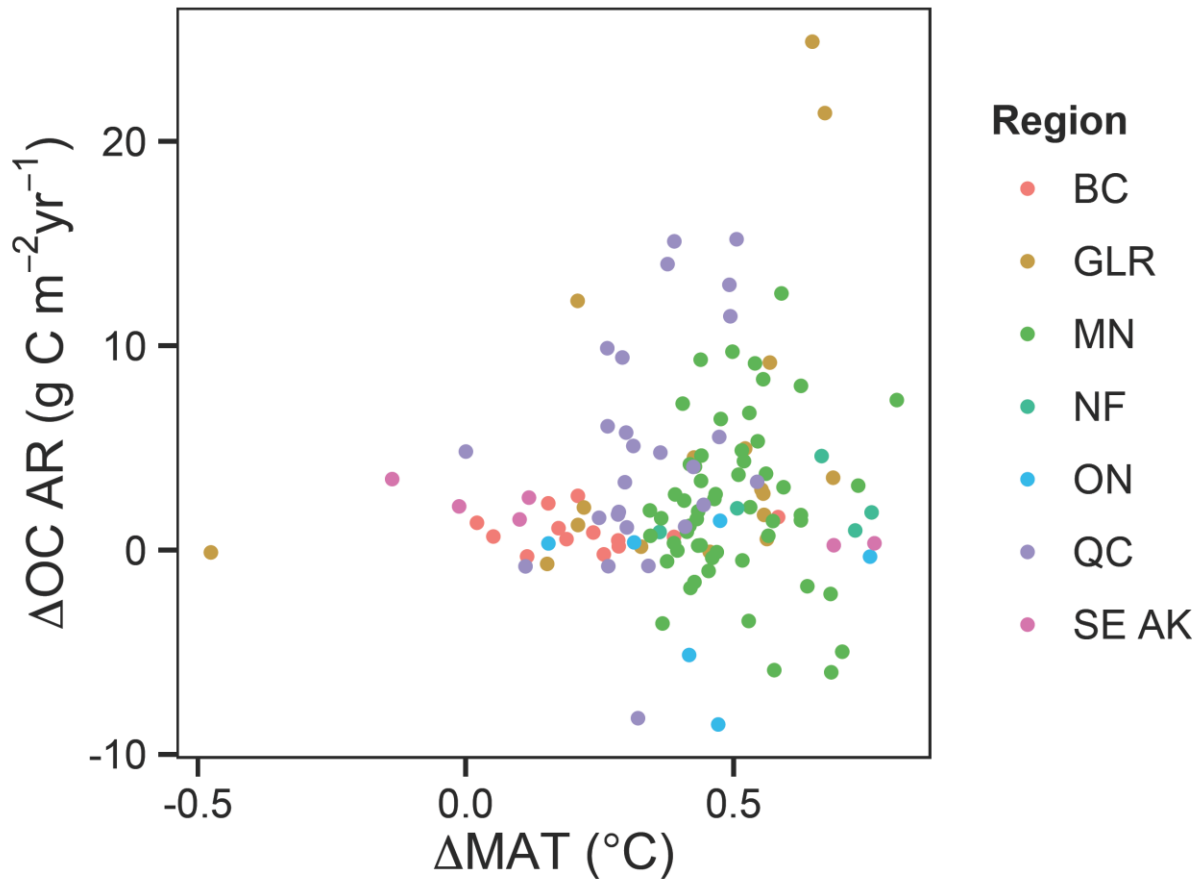

**Supplementary Figure 1. Change in organic-C burial ( $\Delta\text{OC AR}$ ) vs change in observed surface mean annual temperature ( $\Delta\text{MAT}$ ) for lakes in this study.** Only lakes where surface temperature data were recorded within 100 km for > 100 years ( $n = 100$ ) are shown. The regions are British Columbia (BC), Great Lakes Region (GLR), Minnesota (MN), Newfoundland (NF), Ontario (ON), Québec (QC), and southeast Alaska (SE AK).

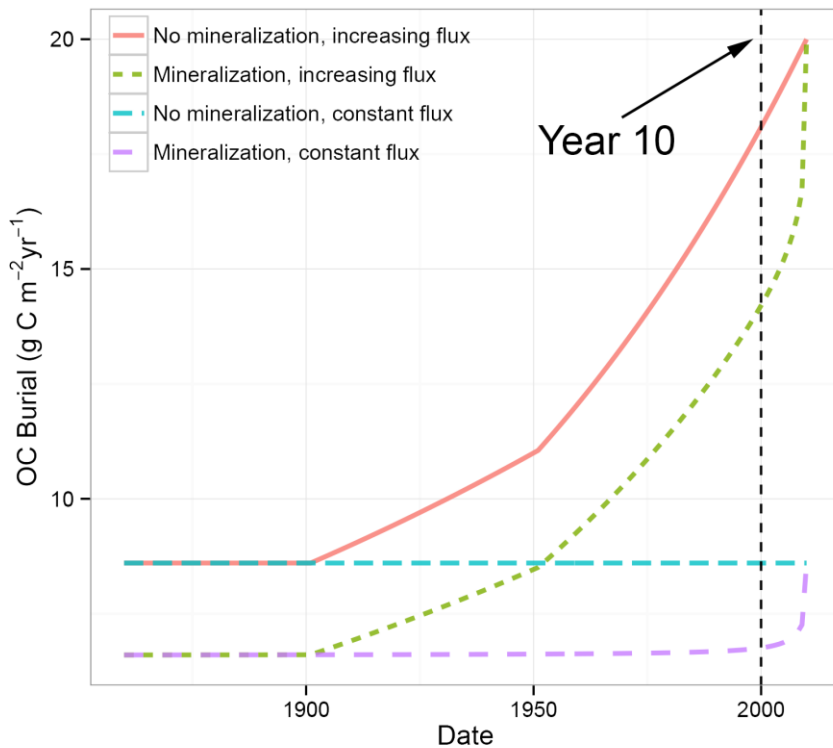

**Supplementary Figure 2. Simulation of organic-C burial and mineralization over time**

**under four scenarios.** Orange and green lines represent constant burial prior to 1900, a 0.5% increase per year from 1900-1950, and a 1% increase per year from 1950 to present.

Mineralization is modelled in the green line and ignored in the orange line. Blue and purple lines represent constant burial rates over time, with mineralization modelled for the purple line and ignored in the blue line. Dashed vertical line represents sediment that is older than 10 years, the cut off used in this study, and marks the transition from a slope primarily driven by mineralization, to one primarily driven by changing rates of organic-C burial. The numbers used for organic-C burial in the simulation are hypothetical, but the overall magnitude and rate of change to burial rates are similar to the average seen in northern lakes for this study. All mineralization rates based on observations from repeated sediment cores conducted by Gälman et al.<sup>1</sup>.

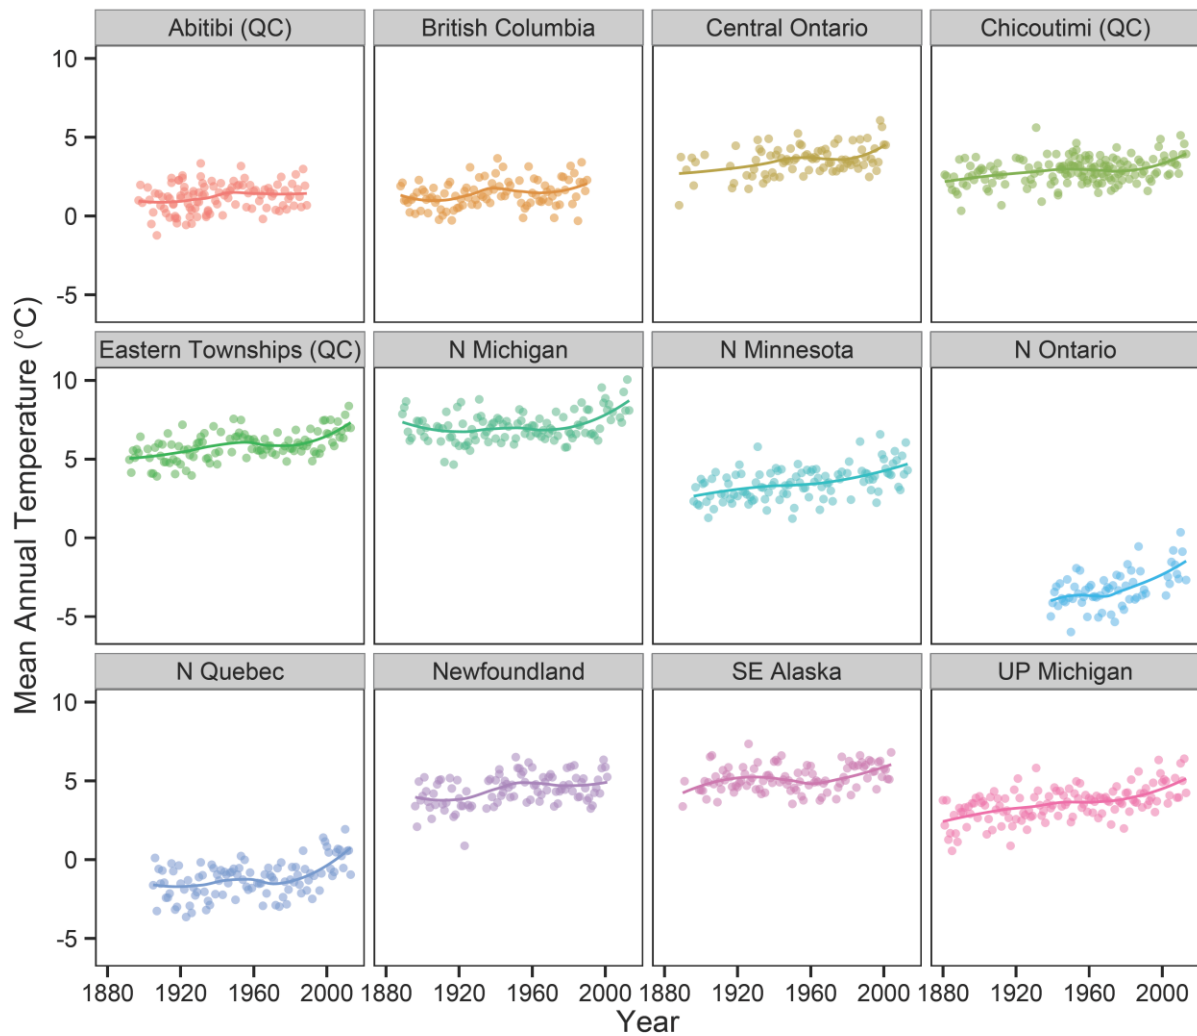

**Supplementary Figure 3. Mean annual temperature over time for climate stations near the lakes from this study.** Most records reflect continuous measurements at a single station, with the exception of Abitibi, Chicoutimi, and Newfoundland, where data from two nearby stations were combined to form a complete record over time. N = north, SE = southeast, QC = Québec, and UP = upper peninsula of Michigan.

**Supplementary Table 1.** Location and literature source for the lakes included in this study.

| Lake                  | Region           | Latitude (N) | Longitude (W) | Citation   |
|-----------------------|------------------|--------------|---------------|------------|
| Boomerang             | British Columbia | 53.6766      | 124.5165      | 2          |
| Jakes                 | British Columbia | 54.3245      | 122.7116      | 2          |
| Justine               | British Columbia | 54.2118      | 124.9375      | 2          |
| Laurie                | British Columbia | 53.8783      | 124.8881      | 2          |
| Pitoney               | British Columbia | 53.6303      | 122.0334      | 2          |
| Secord                | British Columbia | 53.6284      | 124.3368      | 2          |
| Tang                  | British Columbia | 54.3231      | 122.7846      | 2          |
| Unnamed               | British Columbia | 53.8473      | 125.0168      | 2          |
| Upper Summit          | British Columbia | 54.2945      | 122.7174      | 2          |
| Woodcock              | British Columbia | 53.5824      | 123.5961      | 2          |
| Ahmik                 | Great Lakes      | 48.1479      | 88.5415       | This study |
| Bass                  | Great Lakes      | 44.9224      | 85.8832       | This study |
| Beaver                | Great Lakes      | 46.5652      | 86.3436       | This study |
| Florence              | Great Lakes      | 45.0109      | 86.1199       | This study |
| Grand Sable           | Great Lakes      | 46.6479      | 86.0336       | This study |
| Harvey                | Great Lakes      | 48.0507      | 88.7960       | This study |
| Lake Superior         | Great Lakes      | 46.8982      | 86.5007       | 3          |
| Manitou               | Great Lakes      | 45.1269      | 86.0237       | This study |
| Moskey Bay (Superior) | Great Lakes      | 48.0690      | 88.6357       | This study |
| Outer                 | Great Lakes      | 47.0075      | 90.4597       | This study |
| Richie                | Great Lakes      | 48.0409      | 88.7024       | This study |
| Shell                 | Great Lakes      | 44.9474      | 85.8994       | This study |
| Siskwit               | Great Lakes      | 47.9992      | 88.8001       | 3          |
| Agnes                 | Minnesota        | 47.5280      | 92.8116       | 4          |
| Alton                 | Minnesota        | 47.8631      | 90.9083       | 4          |
| Astrid                | Minnesota        | 48.1107      | 92.3289       | 4          |
| August                | Minnesota        | 47.7611      | 91.6064       | 4          |
| Bean-Lake             | Minnesota        | 47.3089      | 91.3007       | 4          |
| Bear                  | Minnesota        | 47.2847      | 91.3443       | 4          |
| Brule                 | Minnesota        | 47.9325      | 90.6721       | 4          |
| Cruiser               | Minnesota        | 48.4986      | 92.8063       | 4          |
| Dunnigan              | Minnesota        | 47.7074      | 91.6323       | 4          |
| Dyers                 | Minnesota        | 47.5286      | 90.9807       | 4          |
| Ek                    | Minnesota        | 47.5286      | 92.8352       | 4          |
| Grassy                | Minnesota        | 47.8035      | 92.0432       | 4          |
| Greenstone            | Minnesota        | 47.9324      | 91.6056       | 4          |
| Kabetogama            | Minnesota        | 48.4583      | 93.0419       | 4          |
| Kjostad               | Minnesota        | 48.1101      | 92.6113       | 4          |

|                      |              |         |         |            |
|----------------------|--------------|---------|---------|------------|
| Lac La Croix         | Minnesota    | 48.3497 | 92.1341 | 4          |
| Little               | Minnesota    | 48.3334 | 93.0964 | 4          |
| Little Trout         | Minnesota    | 48.3972 | 92.5227 | 4          |
| Little Wilson        | Minnesota    | 47.6581 | 91.0666 | 4          |
| Locator              | Minnesota    | 48.5412 | 93.0056 | 4          |
| Loiten               | Minnesota    | 48.5256 | 92.9233 | 4          |
| Maude                | Minnesota    | 48.1092 | 92.3529 | 4          |
| Mukooda              | Minnesota    | 48.3337 | 92.4903 | 4          |
| Namakan              | Minnesota    | 48.4353 | 92.5836 | 4          |
| Ninemile             | Minnesota    | 47.5794 | 91.0833 | 4          |
| Nipisiquit           | Minnesota    | 47.3556 | 91.2474 | 4          |
| Peary                | Minnesota    | 48.5261 | 92.7708 | 4          |
| Rainy                | Minnesota    | 48.6244 | 93.0117 | 4          |
| Ryan                 | Minnesota    | 48.5193 | 92.7074 | 4          |
| Sawbill              | Minnesota    | 47.5280 | 90.8802 | 4          |
| Shoepack             | Minnesota    | 48.5031 | 92.8802 | 4          |
| Speckled Trout       | Minnesota    | 47.5105 | 89.8451 | 4          |
| Swamp                | Minnesota    | 47.9513 | 89.8581 | 4          |
| Tettegouche          | Minnesota    | 47.3456 | 91.2685 | 4          |
| Tooth                | Minnesota    | 48.3983 | 92.6430 | 4          |
| Wilson               | Minnesota    | 47.6750 | 91.0836 | 4          |
| Windy                | Minnesota    | 47.7289 | 91.0766 | 4          |
| Wolf (Johnson)       | Minnesota    | 47.3756 | 91.1893 | 4          |
| Clever               | Newfoundland | 49.1700 | 57.7680 | 5          |
| Frank                | Newfoundland | 49.1780 | 57.6480 | 5          |
| Tomtit               | Newfoundland | 49.1720 | 57.7900 | 5          |
| Topsail              | Newfoundland | 49.1330 | 56.0130 | 5          |
| Big Trout            | Ontario      | 53.7213 | 89.9426 | 3          |
| Eva                  | Ontario      | 48.7132 | 91.1859 | 3          |
| Opeongo              | Ontario      | 45.7180 | 78.3608 | 3          |
| Bousquet             | Quebec       | 48.0286 | 71.4707 | This study |
| Brendan              | Quebec       | 52.0653 | 75.5028 | 6          |
| Cantin               | Quebec       | 47.9761 | 71.1566 | This study |
| Clarence-Gagnon      | Quebec       | 48.0915 | 71.5292 | This study |
| Clarkie              | Quebec       | 52.2278 | 75.4894 | 6          |
| EM-320               | Quebec       | 52.1656 | 76.1208 | 6          |
| Faniant              | Quebec       | 48.1268 | 71.2642 | This study |
| Fraser               | Quebec       | 45.3881 | 72.1780 | This study |
| Grand Lac Montagnais | Quebec       | 47.9186 | 71.2057 | This study |
| Labyrinthe           | Quebec       | 52.2261 | 75.7136 | 6          |
| Lac 11               | Quebec       | 52.1525 | 75.7600 | 6          |
| Lac 2                | Quebec       | 52.1322 | 75.8192 | 6          |
| Lac 34               | Quebec       | 51.9847 | 75.7669 | 6          |

|             |                  |         |          |            |
|-------------|------------------|---------|----------|------------|
| Lac 40      | Quebec           | 52.0294 | 75.5236  | 6          |
| Lac 60      | Quebec           | 52.2317 | 75.7617  | 6          |
| Lac 66      | Quebec           | 51.9600 | 76.0097  | 6          |
| Lac 8       | Quebec           | 52.1319 | 75.7239  | 6          |
| Dasserat    | Quebec           | 48.2492 | 79.4063  | 3          |
| Richelieu   | Quebec           | 48.1560 | 71.3509  | This study |
| Levi Pond   | Quebec (VT, USA) | 44.2671 | 72.2275  | 3          |
| Minipi      | Quebec (LB, CA)  | 52.6679 | 61.7243  | 3          |
| Mistumis    | Quebec           | 52.1617 | 76.1808  | 6          |
| Natel       | Quebec           | 52.1847 | 75.7119  | 6          |
| Q27         | Quebec           | 53.5072 | 77.6986  | 3          |
| Q6          | Quebec           | 51.1156 | 77.3262  | 3          |
| Simoncouche | Quebec           | 48.2400 | 71.2533  | This study |
| Stukely     | Quebec           | 45.3638 | 72.2531  | This study |
| Tourangeau  | Quebec           | 47.9298 | 71.2432  | This study |
| Cliff       | SE Alaska        | 58.2400 | 135.8420 | 5          |
| Goldeneye   | SE Alaska        | 58.2470 | 135.8330 | 5          |
| Rectangle   | SE Alaska        | 58.2370 | 135.8770 | 5          |
| Sapsucker   | SE Alaska        | 58.2330 | 135.8230 | 5          |

---

## Supplementary References

1. Gälman, V., Rydberg, J., Sjöstedt de-Luna, S., Bindler, R. & Renberg, I. Carbon and nitrogen loss rates during aging of lake sediment: Changes over 27 years studied in varved lake sediment. *Limnol. Oceanogr.* **53**, 1076–1082 (2008).
2. Laird, K. & Cumming, B. A regional paleolimnological assessment of the impact of clear-cutting on lakes from the central interior of British Columbia. *Can. J. Fish. Aquat. Sci.* **58**, 492–505 (2001).
3. Muir, D. C. G. *et al.* Spatial trends and historical inputs of mercury and lead in eastern and northern Canada inferred from lake sediment cores. *Environ. Sci. Technol.* **43**, 4802–4809 (2009).
4. Anderson, N. J., Dietz, R. D. & Engstrom, D. R. Land-use change, not climate, controls organic carbon burial in lakes. *Proc. R. Soc. B Biol. Sci.* **280**, 20131278 (2013).
5. Engstrom, D. R. *et al.* Atmospheric Hg emissions from preindustrial gold and silver extraction in the Americas: A reevaluation from lake-sediment archives. *Environ. Sci. Technol.* **48**, 6533–6543 (2014).
6. Ferland, M.-E., del Giorgio, P. A., Teodoru, C. R. & Prairie, Y. T. Long-term C accumulation and total C stocks in boreal lakes in northern Québec. *Global Biogeochem. Cycles* **26**, GB0E04 (2012).
